# Supplementary material for: Traditional Knowledge Aids Description When Resolving the Taxonomic Status of Unsettled Species Using Classical and Molecular Taxonomy: The Case of the Shallow-Water Octopus Callistoctopus furvus (Gould, 1852) From the Western Atlantic Ocean
Source: Frontiers journal article supplement (doi:10.3389/fmars.2020.595244), 2021-01-21
Supplement: Data_Sheet_1.PDF [file Data_Sheet_1.PDF]

## Supplementary File 1: Field Research Form - Local Ecological Knowledge (LEK)

Location: \_\_\_\_\_ Municipality: \_\_\_\_\_

1 - Name of fisher: \_\_\_\_\_

2 - Nickname of fisher: \_\_\_\_\_

3 - Gender: ( ) Male ( ) Female

4 - Age: \_\_\_\_\_

### General aspects of octopus fishing

4. Who taught you how to fish octopus?  
( ) Parents ( ) Grandparents ( ) Friends ( ) Alone;
5. Do you use traps to fish octopus?  
( ) Yes; Which? \_\_\_\_\_ ( ) No
6. Do you use any tools to fish octopus?  
( ) Yes; Which? \_\_\_\_\_ ( ) No
7. Do you dive to fish octopus?  
( ) Yes; ( ) No; ( ) Sometimes;
8. How do you classify octopus fishing in this region? ( ) artisanal; ( ) industrial; ( ) do not know

### Seasonality of octopus fishing

9. How often do you fish octopus?  
( ) Daily; ( ) Weekly; ( ) Fortnightly; ( ) Monthly;
10. In which period do you fish octopus?  
( ) Day; ( ) Night;
11. Is octopus fishing influenced by the tide?  
( ) Yes; ( ) No;
12. In which tide do you fish octopus?  
( ) Low; ( ) High;
13. Does the lunar phase influence octopus fishing?  
( ) Yes; ( ) No;
14. In which lunar phase(s) do you fish octopus?  
( ) Full; ( ) Waning; ( ) Waxing; ( ) New

### Catch effort

15. Do fish octopus alone?  
( ) Yes; ( ) No;
16. How long does an octopus fishery last?  
( ) <3h; ( ) >3h
17. How many kilograms of octopus do you fish per fishery?  
( ) <10kg; ( ) >10Kg
18. How much did the smallest octopus you fished weigh?  
( ) <500g; ( ) > 500g;
19. How much did the largest octopus you fished weigh?  
( ) <2kg; ( ) >2Kg

## Sales

20. Are you a member of a fishing colony?  
( ) Yes; Which? \_\_\_\_\_ ( ) No
21. Is octopus fishing your main work activity?  
( ) Yes ( ) No
22. Do you sell all the octopuses you fish?  
( ) Yes; To whom? \_\_\_\_\_ ( ) No;
23. Do you consume all the octopuses you fish?  
( ) Yes; ( ) No;
24. Do you know how to differentiate male octopus from female octopus?  
( ) Yes; ( ) No;
25. Do you think there is more than one type of octopus in your region?  
( ) Yes; ( ) No;

### Aspects of octopus fishing for *Callistoctopus*

26. Have you seen/captured and/or photographed an octopus that had white spots all over its body?  
( ) Yes ( ) No
27. If your answer was "yes", do you remember the size of this octopus?  
\_\_\_\_\_cm \_\_\_\_\_kg
28. What was the size of the largest octopus of this "kind" you fished?
29. What year was it fished? \_\_\_\_\_
30. Where did you fish this octopus?  
\_\_\_\_\_
31. Which fishing gear did you use?  
\_\_\_\_\_
32. How many octopuses of this species did you catch on your best fishing day?  
\_\_\_\_\_
33. In what month and at what time did this happen?  
\_\_\_\_\_
34. What year? \_\_\_\_\_
35. Where did you fish?  
\_\_\_\_\_
36. What factor do you most take into account to differentiate this octopus from the common octopus?  
( ) Size ( ) Weight ( ) Colour
37. Regarding the colour, how do you differentiate this octopus from the ordinary octopus?
38. How deep is the place where this octopus is found?  
( ) >1m<5m; ( ) >5m<10m; ( ) >10m.
