# Supplementary material for: Traditional Knowledge Aids Description When Resolving the Taxonomic Status of Unsettled Species Using Classical and Molecular Taxonomy: The Case of the Shallow-Water Octopus Callistoctopus furvus (Gould, 1852) From the Western Atlantic Ocean
Source: Frontiers journal article supplement (doi:10.3389/fmars.2020.595244), 2021-01-21
Supplement: Table_1.docx [file Table_1.docx]

| Supplementary Table 1. Summary data on the specimens used in PCA and LDA analyses. | | | | |
| --- | --- | --- | --- | --- |
| Depository and Collection number | Collection site | Geographic area | ML (mm) | Sex |
| MZUSP 152154 (Neotype) | Morro de São Paulo, Bahia, Brazil | SW Atlantic | 97.7 | male |
| MZUSP 152155 | Morro de São Paulo, Bahia, Brazil | SW Atlantic | 112.9 | male |
| NHMUK 20200275 | Morro de São Paulo, Bahia, Brazil | SW Atlantic | 110.5 | male |
| MZUSP 152156 | Morro de São Paulo, Bahia, Brazil | SW Atlantic | 135 | female |
| MZUSP 152157 | Morro de São Paulo, Bahia, Brazil | SW Atlantic | 110.5 | female |
| MZUSP 152158 | Morro de São Paulo, Bahia, Brazil | SW Atlantic | 80.2 | female |
| NHMUK 20200276 | Morro de São Paulo, Bahia, Brazil | SW Atlantic | 93.6 | female |
| NHMUK 20200277 | Morro de São Paulo, Bahia, Brazil | SW Atlantic | 85.2 | female |
| NHMUK 20200278 | Morro de São Paulo, Bahia, Brazil | SW Atlantic | 97.7 | female |
| – | Morro de São Paulo, Bahia, Brazil | SW Atlantic | 69 | male |
| – | Morro de São Paulo, Bahia, Brazil | SW Atlantic | 109.8 | male |
| – | Morro de São Paulo, Bahia, Brazil | SW Atlantic | 109 | male |
| – | Morro de São Paulo, Bahia, Brazil | SW Atlantic | 84.6 | undetermined |
| NHMUK 743 - Reg TBC | Barbados | Caribbean | 9.5 | female |
| NHMUK “27230” - Reg TBC | Port-au-Prince Bay, Haiti | Caribbean | 18.4 | male |
| NHMUK “27230” - Reg TBC | Port-au-Prince Bay, Haiti | Caribbean | 15 | undetermined |
| NHMUK “27491” - Reg TBC | Port-au-Prince Bay, Haiti | Caribbean | 48 | male |
| NHMUK 1958.12.30.67 | Madeira Archipelago, Portugal | Macaronesia | 118 | male |
| NHMUK 1958.12.30.68 | Madeira Archipelago, Portugal | Macaronesia | 19.9 | undetermined |
| NHMUK 1958.12.30.69 | Madeira Archipelago, Portugal | Macaronesia | 13.6 | undetermined |
| NHMUK 1958.12.30.70 | Madeira Archipelago, Portugal | Macaronesia | 23.9 | undetermined |
| NHMUK 1958.12.30.71 | Madeira Archipelago, Portugal | Macaronesia | 23.1 | undetermined |
| NHMUK 1958.12.30.72 | Madeira Archipelago, Portugal | Macaronesia | 21.7 | undetermined |
| NHMUK 1958.12.30.73 | Madeira Archipelago, Portugal | Macaronesia | 18.8 | undetermined |
| NHMUK 1958.12.30.74 | Madeira Archipelago, Portugal | Macaronesia | 14.7 | undetermined |
| NHMUK 1898.5.21.344 | Zoological Station Naples, Italy | Mediterranean | 47 | female |
| NHMUK Reg TBC | Naples, Italy | Mediterranean | 30.7 | female |
| NHMUK 1952.4.1.43 | Villefranche-sur-Mer, France | Mediterranean | 62.4 | male |
