# Supplementary material for: Traditional Knowledge Aids Description When Resolving the Taxonomic Status of Unsettled Species Using Classical and Molecular Taxonomy: The Case of the Shallow-Water Octopus Callistoctopus furvus (Gould, 1852) From the Western Atlantic Ocean
Source: Frontiers journal article supplement (doi:10.3389/fmars.2020.595244), 2021-01-21
Supplement: Table_2.docx [file Table_2.docx]

| Supplementary Table 2. Species list, origin and Genbank accession number of *Callistoctopus* sequences (16S + COI) utilized in present study. * = 16S sequence only. | | |
| --- | --- | --- |
| Species | Origin | GenBank Acession number |
| *Callistoctopus furvus*1 | Morro de São Paulo, Bahia, Brazil |  |
| *Callistoctopus furvus* 4 | Morro de São Paulo, Bahia, Brazil |  |
| *Callistoctopus furvus* 5 | Morro de São Paulo, Bahia, Brazil |  |
| *Callistoctopus furvus* 7 | Morro de São Paulo, Bahia, Brazil |  |
| *Callistoctopus furvus* 13 | Morro de São Paulo, Bahia, Brazil |  |
| *Callistoctopus furvus* 16 | Morro de São Paulo, Bahia, Brazil |  |
| *Callistoctopus ornatus* 1 | Hawaii, USA | GQ900705/AB430528 |
| *Callistoctopus aspilosomatis* | Unknow | AJ311109/AB430525 |
| *Callistoctopus furvus* | Mexico | MH662561/MH662527 |
| *Callistoctopus luteus*1 | Hawaii, USA | GQ900707/NC039848 |
| *Callistoctopus luteus*2 | Taiwan | AJ252749/AB385874 |
| *Callistoctopus minor*1 | Osaka, Japan | AB191110/AB191275 |
| *Callistoctopus minor*2 | China | MF631954/MF029677 |
| *Callistoctopus minor*3 | China | MF631953/Ab430541 |
| *Callistoctopus minor4* | Taiwan | MF631925/MF631967 |
| *Callistoctopus minor5* | Taiwan | MF631926/ MF631968 |
| *Callistoctopus macropus*1 | France | AJ616310* |
| *Callistoctopus macropus*2 | Colombia | MF040869/MG778073 |
| *Grimpella thaumastocheir* | Unknow | HM104246/HM104259 |
